# Supplementary material for: Discriminative stimuli are sufficient for incubation of cocaine craving
Source: eLife. 2019 Feb 25;8:e44427. doi: 10.7554/eLife.44427 (PMC6417857; doi:10.7554/eLife.44427)
Supplement: Figure 1—source data 1. [file elife-44427-fig1-data1.docx]

## Figure 1-source data 1. Statistical output for Experiment 1: Incubation of discriminative stimulus-controlled cocaine seeking (analyses pertaining to Figure 1 are highlighted in grey)

| **Experimental phase** | **Behavioral measure** | **Factors in analysis** | **F-value** | **P-value** | **Figure** |
| --- | --- | --- | --- | --- | --- |
| Self-administration | Infusions | Session x Sex |  |  |  |
|  | Session | F5,60=1.84 | 0.1192 |  |
|  | Sex | F1,12=0.12 | 0.7307 |  |
|  | Session x Sex | F5,60=0.55 | 0.7397 |  |
| Presses | Session x Sex |  |  |  |
|  | Session | F5,60=0.66 | 0.6555 |  |
|  | Sex | F1,12=0.77 | 0.3976 |  |
|  | Session x Sex | F5,60=0.28 | 0.9244 |  |
| Infusions | Session (collapsed across Sex) |  |  | 1C |
|  | Session | F5,65=1.90 | 0.1061 |
| Presses | Session (collapsed across Sex) |  |  | 1C |
|  | Session | F5,65=0.69 | 0.6299 |
| Discrimination training | Trials | DS x Session x Sex |  |  |  |
|  | DS | F1,12=992.35 | <0.0001 |  |
|  | Session | F9,108=1.55 | 0.1407 |  |
|  | Sex | F1,12=0.30 | 0.5962 |  |
|  | DS x Sex | F1,12=2.68 | 0.1276 |  |
|  | DS x Session | F9,108=1.72 | 0.0926 |  |
|  | Session x Sex | F9,108=1.05 | 0.4047 |  |
|  | DS x Session x Sex | F9,108=2.16 | 0.0302 |  |
| Presses | DS x Session x Sex |  |  |  |
|  | DS | F1,12=178.08 | <0.0001 |  |
|  | Session | F9,108=1.47 | 0.1684 |  |
|  | Sex | F1,12=1.81 | 0.2038 |  |
|  | DS x Sex | F1,12=3.89 | 0.0720 |  |
|  | DS x Session | F9,108=2.89 | 0.0042 |  |
|  | Session x Sex | F9,108=1.35 | 0.2225 |  |
|  | DS x Session x Sex | F9,108=2.79 | 0.0056 |  |
| Trials | DS x Session (collapsed across Sex) |  |  | 1C |
|  | DS | F1,13=948.21 | <0.0001 |
|  | Session | F9,117=1.48 | 0.1645 |
|  | DS x Session | F9,117=1.65 | 0.1104 |
| Presses | DS x Session (collapsed across Sex) |  |  | 1C |
|  | DS | F1,13=161.63 | <0.0001 |
|  | Session | F9,117=1.39 | 0.2014 |
|  | DS x Session | F9,117=2.62 | 0.0085 |

| **Experimental phase** | **Behavioral measure** | **Factors in analysis** | **F-value** | **P-value** | **Figure** |
| --- | --- | --- | --- | --- | --- |
| Relapse test | Trials | DS x Day x Sex |  |  |  |
|  | DS | F1,12=270.55 | <0.0001 |  |
|  | Day | F6,66=11.25 | <0.0001 |  |
|  | Sex | F1,12=9.92 | 0.0084 |  |
|  | DS x Sex | F1,12=12.99 | 0.0036 |  |
|  | DS x Day | F6,66=4.82 | 0.0004 |  |
|  | Day x Sex | F6,66=2.02 | 0.0752 |  |
|  | DS x Day x Sex | F6,66=0.76 | 0.6020 |  |
| Presses | DS x Day x Sex |  |  |  |
|  | DS | F1,12=172.77 | <0.0001 |  |
|  | Day | F6,66=9.15 | <0.0001 |  |
|  | Sex | F1,12=3.51 | 0.0854 |  |
|  | DS x Sex | F1,12=3.22 | 0.0981 |  |
|  | DS x Day | F6,66=7.74 | <0.0001 |  |
|  | Day x Sex | F6,66=0.83 | 0.5529 |  |
|  | DS x Day x Sex | F6,66=0.28 | 0.9440 |  |
| Trials | DS x Day (collapsed across Sex) |  |  | 1D |
|  | DS | F1,13=257.53 | <0.0001 |
|  | Day | F6,72=9.68 | <0.0001 |
|  | DS x Day | F6,72=4.30 | 0.0009 |
| Presses | DS x Day (collapsed across Sex) |  |  | 1D |
|  | DS | F1,13=182.25 | <0.0001 |
|  | Day | F6,72=8.94 | <0.0001 |
|  | DS x Day | F6,72=7.95 | <0.0001 |
| Reinstatement test | Trials | DS x Treatment x Sex |  |  |  |
|  | DS | F1,9=101.26 | <0.0001 |  |
|  | Treatment | F3,27=11.37 | <0.0001 |  |
|  | Sex | F1,9=4.57 | 0.0613 |  |
|  | DS x Sex | F1,9=0.09 | 0.7703 |  |
|  | DS x Treatment | F3,27=11.89 | <0.0001 |  |
|  | Treatment x Sex | F3,27=0.73 | 0.5409 |  |
|  | DS x Treatment x Sex | F3,27=0.23 | 0.8718 |  |
| Presses | DS x Treatment x Sex |  |  |  |
|  | DS | F1,9=41.43 | 0.0001 |  |
|  | Treatment | F3,27=7.89 | 0.0006 |  |
|  | Sex | F1,9=1.82 | 0.2099 |  |
|  | DS x Sex | F1,9=0.53 | 0.4868 |  |
|  | DS x Treatment | F3,27=8.64 | 0.0003 |  |
|  | Treatment x Sex | F3,27=0.63 | 0.6029 |  |
|  | DS x Treatment x Sex | F3,27=0.26 | 0.8560 |  |
| Trials | DS x Treatment (collapsed across Sex) |  |  | 1E |
|  | DS | F1,10=108.66 | <0.0001 |
|  | Treatment | F3,30=15.35 | <0.0001 |
|  | DS x Treatment | F3,30=12.42 | <0.0001 |
| Presses | DS x Treatment (collapsed across Sex) |  |  | 1E |
|  | DS | F1,10=45.73 | <0.0001 |
|  | Treatment | F3,30=8.31 | 0.0004 |
|  | DS x Treatment | F3,30=9.45 | 0.0001 |
