# Supplementary material for: Discriminative stimuli are sufficient for incubation of cocaine craving
Source: eLife. 2019 Feb 25;8:e44427. doi: 10.7554/eLife.44427 (PMC6417857; doi:10.7554/eLife.44427)
Supplement: Figure 2—source data 1. [file elife-44427-fig2-data1.docx]

## Figure 2-source data 1. Statistical output for Experiment 2: Abatement of discriminative stimulus-controlled palatable food-seeking (analyses pertaining to Figure 2 are highlighted in grey)

| **Experimental phase** | **Behavioral measure** | **Factors in analysis** | **F-value** | **P-value** | **Figure** |
| --- | --- | --- | --- | --- | --- |
| Self-administration | Pellets | Session x Sex |  |  |  |
|  | Session | F2,28=5.57 | 0.0092 |  |
|  | Sex | F1,14=0.89 | 0.3620 |  |
|  | Session x Sex | F2,28=0.39 | 0.6831 |  |
| Presses | Session x Sex |  |  |  |
|  | Session | F2,28=6.98 | 0.0035 |  |
|  | Sex | F1,14=0.05 | 0.8317 |  |
|  | Session x Sex | F2,28=0.11 | 0.8989 |  |
| Pellets | Session (collapsed across Sex) |  |  | 2C |
|  | Session | F2,30=5.75 | 0.0077 |
| Presses | Session (collapsed across Sex) |  |  | 2C |
|  | Session | F2,30=7.44 | 0.0024 |
| Discrimination training | Trials | DS x Session x Sex |  |  |  |
|  | DS | F1,13=998.32 | <0.0001 |  |
|  | Session | F10,130=15.36 | <0.0001 |  |
|  | Sex | F1,13=1.78 | 0.2053 |  |
|  | DS x Sex | F1,13=1.38 | 0.2618 |  |
|  | DS x Session | F10,130=8.06 | <0.0001 |  |
|  | Session x Sex | F10,130=0.99 | 0.4539 |  |
|  | DS x Session x Sex | F10,130=0.65 | 0.7660 |  |
| Presses | DS x Session x Sex |  |  |  |
|  | DS | F1,13=571.09 | <0.0001 |  |
|  | Session | F10,130=15.05 | <0.0001 |  |
|  | Sex | F1,13=1.43 | 0.2537 |  |
|  | DS x Sex | F1,13=5.89 | 0.0304 |  |
|  | DS x Session | F10,130=2.34 | 0.0141 |  |
|  | Session x Sex | F10,130=0.78 | 0.6461 |  |
|  | DS x Session x Sex | F10,130=0.59 | 0.8216 |  |
| Trials | DS x Session (collapsed across Sex) |  |  | 2C |
|  | DS | F1,14=577.71 | <0.0001 |
|  | Session | F10,140=15.63 | <0.0001 |
|  | DS x Session | F10,140=2.31 | 0.0151 |
| Presses | DS x Session (collapsed across Sex) |  |  | 2C |
|  | DS | F1,14=1014.94 | <0.0001 |
|  | Session | F10,140=15.42 | <0.0001 |
|  | DS x Session | F10,140=8.22 | <0.0001 |

| **Experimental phase** | **Behavioral measure** | **Factors in analysis** | **F-value** | **P-value** | **Figure** |
| --- | --- | --- | --- | --- | --- |
| Relapse test | Trials | DS x Day x Sex |  |  |  |
|  | DS | F1,13=124.95 | <0.0001 |  |
|  | Day | F4,52=7.43 | <0.0001 |  |
|  | Sex | F1,13=6.56 | 0.0237 |  |
|  | DS x Sex | F1,13=0.02 | 0.8961 |  |
|  | DS x Day | F4,52=13.12 | <0.0001 |  |
|  | Day x Sex | F4,52=4.11 | 0.0058 |  |
|  | DS x Day x Sex | F4,52=0.43 | 0.7849 |  |
| Presses | DS x Day x Sex |  |  |  |
|  | DS | F1,13=107.56 | <0.0001 |  |
|  | Day | F4,52=8.68 | <0.0001 |  |
|  | Sex | F1,13=0.01 | 0.9134 |  |
|  | DS x Sex | F1,13=3.33 | 0.0910 |  |
|  | DS x Day | F4,52=18.11 | <0.0001 |  |
|  | Day x Sex | F4,52=2.15 | 0.0875 |  |
|  | DS x Day x Sex | F4,52=1.91 | 0.1233 |  |
| Trials | DS x Day (collapsed across Sex) |  |  | 2D |
|  | DS | F1,14=133.04 | <0.0001 |
|  | Day | F4,56=5.57 | 0.0008 |
|  | DS x Day | F4,56=14.29 | <0.0001 |
| Presses | DS x Day (collapsed across Sex) |  |  | 2D |
|  | DS | F1,14=101.92 | <0.0001 |
|  | Day | F4,56=8.57 | <0.0001 |
|  | DS x Day | F4,56=17.44 | <0.0001 |
